# Supplementary material
Source: Springer Nature journal article supplement (https://www.springermedizin.de/resource/supplementary/12913_2011_2204_MOESM1_ESM.pdf/9529664)
Supplement: MOESM1 [file 9529664]

2594 eligibility patients were randomized

## Enrollment

Not enrolled (n=1059)

- unwilling or unable to participate (n=575)
- no reply (n= 484)

## Allocation

Allocated to intervention arm (n=1034)

- Committed to intervention and usual care (n=932)
- No commitment (n=102)

Allocated to control arm (n=501)

- Committed to usual care (n=463)
- No commitment (n=38)

## Follow-Up

Lost to follow-up (no information) (n=10)

Discontinued intervention (quit or drop out) (n=106)

- withdraw consent (n=23)
- dead (n=17)
- other reason (n=66) (e.g. moved to other area, serious illness)

Lost to follow-up (no information) (n=11)

Discontinued (quit or drop out) (n=47)

- withdraw consent (n=22)
- dead (n=12)
- other reason (n=13) (eg. moved to other area, serious illness)

## Analysis

Analysed (n=816)

Analysed (n=405)
